# Supplementary material
Source: Springer Nature journal article supplement (https://www.springermedizin.de/resource/supplementary/12895_2012_135_MOESM1_ESM.pdf/9514180)
Supplement: MOESM1 [file 9514180]

Assessed for eligibility  
(n=78)

Excluded (n=38)  
Not meeting inclusion criteria (n=25)  
Declined to participate (n=13)

Randomised (n=40)

Allocated to intervention  
treatment UC (n=20)

Allocated to control treatment EC  
(n=20)

Analysed (n=20)

Analysed (n=20)
